# Supplementary material for: Detection of epinephrine and metanephrine at a nitrogen doped three-dimensional porous graphene modified electrode
Source: Royal Society of Chemistry journal article supplement (doi:10.1039/c5ay02454d), 2015-01-01
Supplement: c5ay02454d1.pdf [file c5ay02454d1.pdf]

## Supporting Information

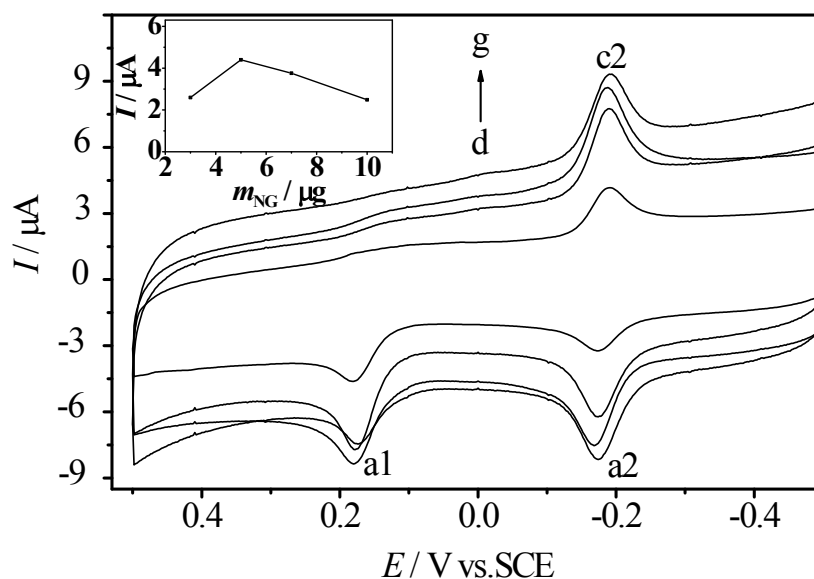

Fig. S1 CVs of EP with different modified mass of NG: 3.0, 5.0, 7.0, 9.0  $\mu\text{g}$  (from d to g) in pH 7.0 PBS. Scan rate: 50  $\text{mV s}^{-1}$ . Inset: plot of the relationship between modified mass of NG and peak a1 current.

Fig. S1 displays the influence of NG mass dripped on the surface of GCE in the detection of EP. It was showed that, the peak current was obviously increased with rising the mass of NG, but decreased after dripping more than 5  $\mu\text{g}$  (Fig. S1).

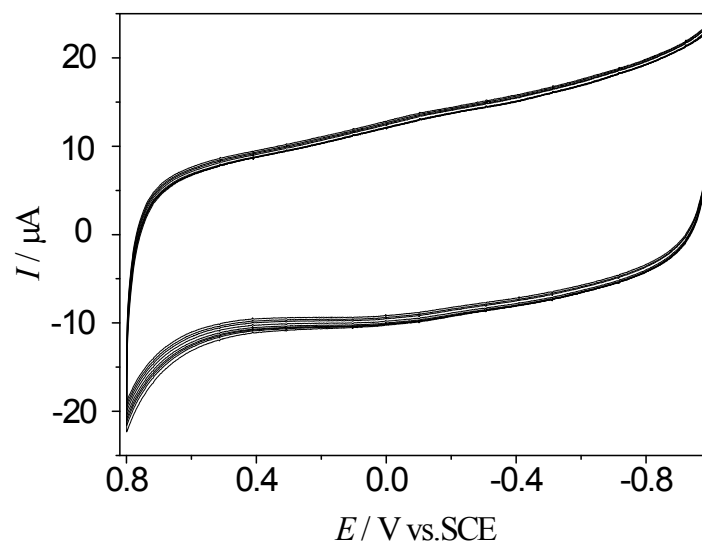

Fig. S2 CVs of 0.1 M pH 7.0 PBS at NG/CS/GCE. Scan rate: 100  $\text{mV s}^{-1}$

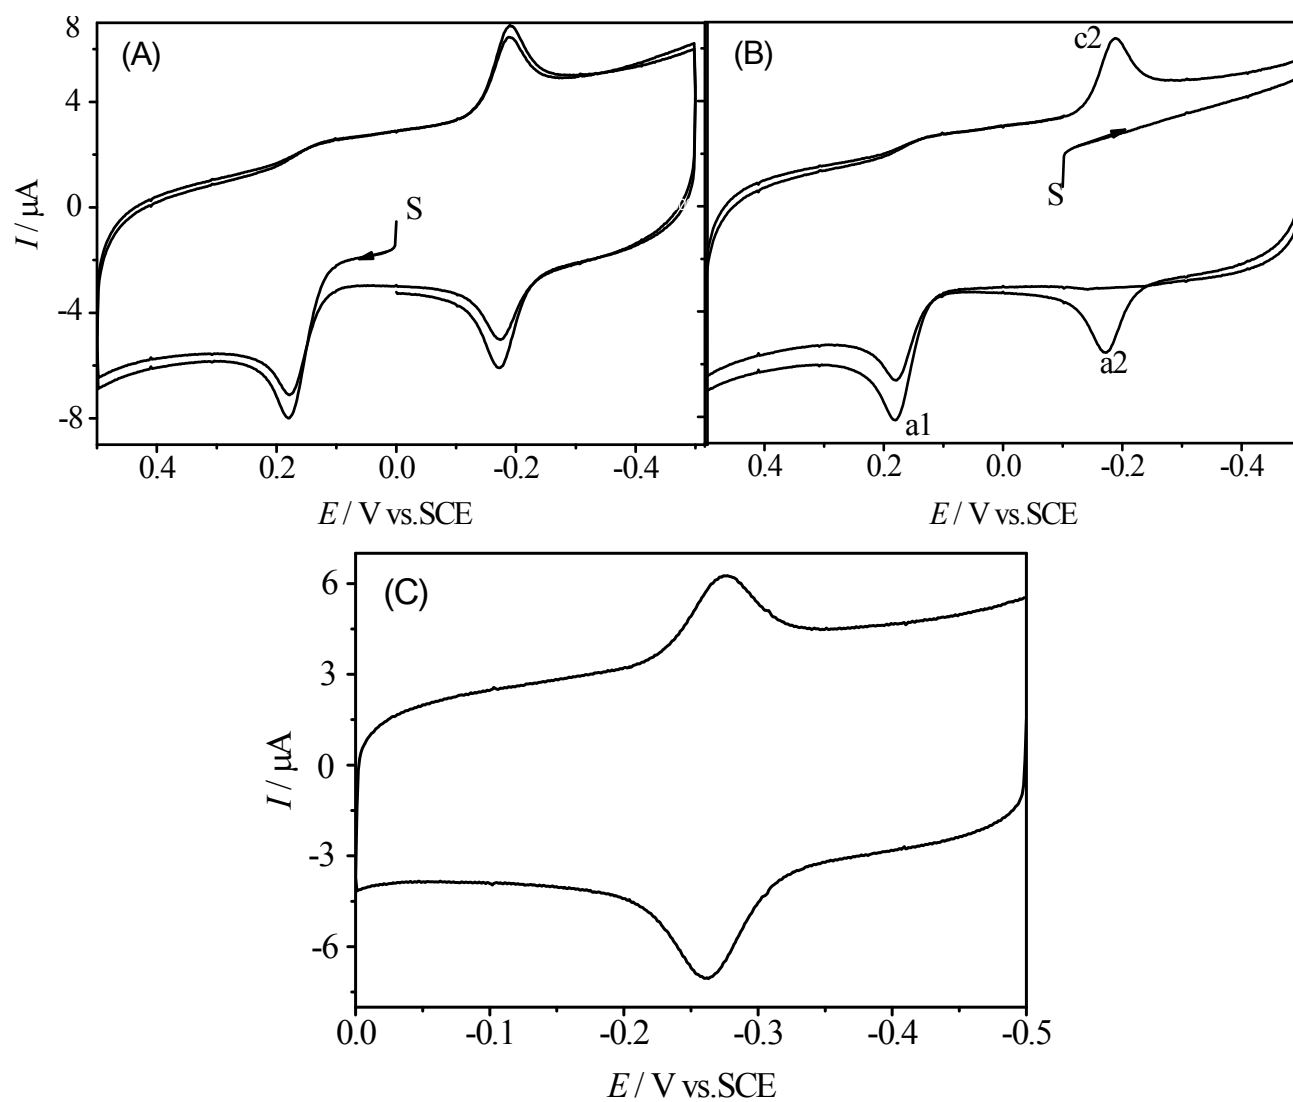

Fig .S3 CVs of 0.1 mM EP at NG/CS/GCE with different starting potentials (A and B) and scan range (C) in 0.1 M pH 7.0 PBS at 50 mV s<sup>-1</sup>. S is the starting point of the potential scan.
